# Supplementary material for: A BMPR2/YY1 Signaling Axis Is Required for Human Cytomegalovirus Latency in Undifferentiated Myeloid Cells
Source: PubMed Central journal article supplement (PMC8262994; doi:10.1128/mbio.00227-21), 2021-06-01

S1A

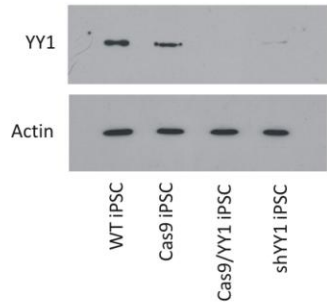

S1B

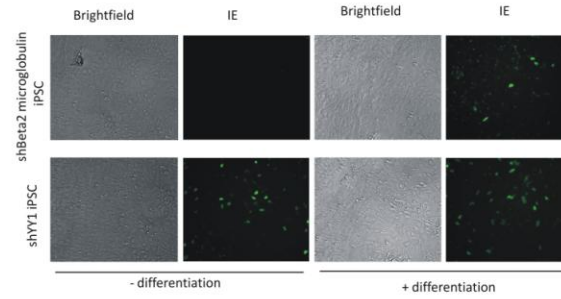

S1C

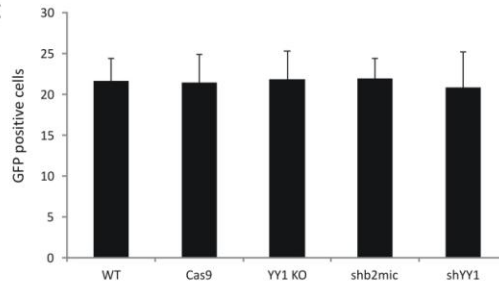

S1D

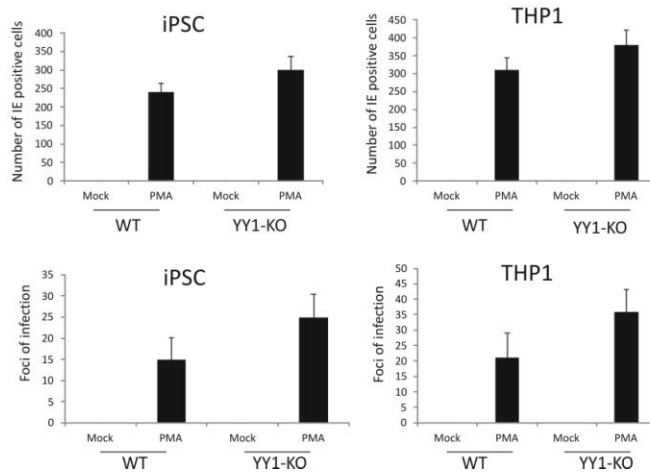

Supplement: mbio.00227-21-sf001.pdf [file mbio.00227-21-sf001.pdf]
